# Supplementary material for: Metabolic and Demographic Feedbacks Shape the Emergent Spatial Structure and Function of Microbial Communities
Source: PubMed Central journal article supplement (PMC3873226; doi:10.1371/journal.pcbi.1003398), 2013-12-26
Supplement: pcbi.1003398.s012.pdf [file pcbi.1003398.s012.pdf]

**Table S1. Reactions and respective stoichiometry of biological processes used in the models**

| Process                   | Solute |           | Biomass   |                     | Rate expression                                                             |
|---------------------------|--------|-----------|-----------|---------------------|-----------------------------------------------------------------------------|
|                           | $R$    | $E$       | $X_A$     | $X_B$               |                                                                             |
| Growth of producer, A     | -1     | $Y_{E,A}$ | $Y_{R,A}$ | -                   | $\mu_{\max,A} \frac{R}{K_{R,A} + R} \frac{K_{i,E}}{K_{i,E} + E} X_A$        |
| Growth of cross-feeder, B | -1     | -1        | -         | $Y_{R,B} + Y_{E,B}$ | $\mu_{\max,B} \left( \frac{R}{K_{R,B} + R} + \frac{E}{K_E + E} \right) X_B$ |
