# Supplementary material for: Metabolic and Demographic Feedbacks Shape the Emergent Spatial Structure and Function of Microbial Communities
Source: PubMed Central journal article supplement (PMC3873226; doi:10.1371/journal.pcbi.1003398), 2013-12-26
Supplement: pcbi.1003398.s013.pdf [file pcbi.1003398.s013.pdf]

**Table S2. Model parameters**

| Symbol        | Description                                           | Value                                                                                                    | Unit                 |
|---------------|-------------------------------------------------------|----------------------------------------------------------------------------------------------------------|----------------------|
| $\mu_{max,A}$ | Maximum cell growth rate of species A                 | 1*                                                                                                       | $h^{-1}$             |
| $\mu_{max,B}$ | Maximum cell growth rate of species B                 | 1*                                                                                                       | $h^{-1}$             |
| $Y_{R,A}$     | Biomass yield of species A on R                       | 0.5*                                                                                                     | $g \cdot g^{-1}$     |
| $Y_{E,A}$     | Yield of E produced per R consumed                    | 2                                                                                                        | $g \cdot g^{-1}$     |
| $Y_{R,B}$     | Biomass yield of species B on R                       | 0.125 ( $B_{facW}$ )<br>0.25 ( $B_{facI}$ )<br>0.375 ( $B_{facS}$ )<br>0.5 ( $B_{ncf}$ )                 | $g \cdot g^{-1}$     |
| $Y_{E,B}$     | Biomass yield of species B on E                       | 0.125 ( $B_{facS}$ )<br>0.25 ( $B_{facI}$ )<br>0.375 ( $B_{facW}$ )<br>0.5 ( $B_{obl}$ )                 | $g \cdot g^{-1}$     |
| $K_{R,A}$     | Species A half-saturation constant for R              | $3.5 \times 10^{-5}$ *                                                                                   | $g \cdot L^{-1}$     |
| $K_{R,B}$     | Species B half-saturation constant for R              | $3.5 \times 10^{-4}$                                                                                     | $g \cdot L^{-1}$     |
| $K_E$         | Species B half-saturation constant for E              | $3.5 \times 10^{-5}$ ( $B_{fac}$ )<br>$3.5 \times 10^{-6}$ ( $B_{obl}$ )                                 | $g \cdot L^{-1}$     |
| $K_{i,E}$     | Half-saturation inhibition constant of E on species A | $3.5 \times 10^{-2}$ (low tox.)<br>$3.5 \times 10^{-3}$ (inter tox.)<br>$3.5 \times 10^{-4}$ (high tox.) | $g \cdot L^{-1}$     |
| $R_{Bulk}$    | Concentration of R in the bulk                        | 0.125*                                                                                                   | $g \cdot L^{-1}$     |
| $D_R$         | R diffusivity                                         | $9.6 \times 10^{-7}$ *                                                                                   | $m^2 \cdot day^{-1}$ |
| $D_E$         | E diffusivity                                         | $7.2 \times 10^{-6}$ *                                                                                   | $m^2 \cdot day^{-1}$ |

\*Values from [1]

**References**

1. Mitri S, Xavier JB, Foster KR (2011) Social evolution in multispecies biofilms. Proc Natl Acad Sci U S A 108 Suppl 2: 10839-10846.
